# Supplementary material for: PaPro1 and IDC4, Two Genes Controlling Stationary Phase, Sexual Development and Cell Degeneration in Podospora anserina
Source: MDPI journal article supplement (doi:10.3390/jof4030085), 2018-07-11
Supplement: s1 [file s1]

## mat+

| Gene  | Type | Reaction Efficiency | Expression | Std. Error    | 95% C.I.      | P(H1) | Result |
|-------|------|---------------------|------------|---------------|---------------|-------|--------|
| CIT1  | REF  | 0,88                | 1,049      |               |               |       |        |
| GPD   | REF  | 0,91                | 0,995      |               |               |       |        |
| TBP   | REF  | 0,97                | 0,959      |               |               |       |        |
| STE11 | TRG  | 0,825               | 1,081      | 0,892 - 1,314 | 0,741 - 1,668 | 0,472 |        |
| HMG8  | TRG  | 0,814               | 0,336      | 0,256 - 0,422 | 0,212 - 0,459 | 0,001 | DOWN   |
| FPR1  | TRG  | 0,957               | 0,403      | 0,345 - 0,476 | 0,311 - 0,520 | 0,000 | DOWN   |
| MFP   | TRG  | 0,832               | 0,169      | 0,122 - 0,233 | 0,085 - 0,336 | 0,000 | DOWN   |
| PRE2  | TRG  | 0,969               | 0,048      | 0,040 - 0,059 | 0,034 - 0,066 | 0,001 | DOWN   |
| Nox1  | TRG  | 0,987               | 0,955      | 0,898 - 1,009 | 0,877 - 1,071 | 0,094 |        |
| NoxD  | TRG  | 0,919               | 0,603      | 0,530 - 0,680 | 0,489 - 0,753 | 0,002 | DOWN   |
| Mpk1  | TRG  | 0,983               | 1,188      | 1,116 - 1,255 | 1,043 - 1,279 | 0,001 | UP     |

## mat-

| Gene  | Type | Reaction Efficiency | Expression | Std. Error    | 95% C.I.      | P(H1) | Result |
|-------|------|---------------------|------------|---------------|---------------|-------|--------|
| CIT1  | REF  | 0,88                | 1,024      |               |               |       |        |
| GPD   | REF  | 0,91                | 0,969      |               |               |       |        |
| TBP   | REF  | 0,97                | 1,007      |               |               |       |        |
| STE11 | TRG  | 0,825               | 1,009      | 0,784 - 1,294 | 0,690 - 1,569 | 0,931 |        |
| HMG8  | TRG  | 0,907               | 0,288      | 0,220 - 0,383 | 0,201 - 0,422 | 0,000 | DOWN   |
| FMR1  | TRG  | 0,887               | 0,145      | 0,110 - 0,187 | 0,103 - 0,221 | 0,000 | DOWN   |
| MFM   | TRG  | 0,822               | 0,306      | 0,212 - 0,433 | 0,204 - 0,509 | 0,000 | DOWN   |
| PRE1  | TRG  | 0,972               | 0,033      | 0,025 - 0,046 | 0,019 - 0,055 | 0,001 | DOWN   |
| Nox1  | TRG  | 0,987               | 1,092      | 1,013 - 1,186 | 0,996 - 1,262 | 0,006 | UP     |
| NoxD  | TRG  | 0,919               | 0,624      | 0,566 - 0,679 | 0,543 - 0,716 | 0,000 | DOWN   |
| Mpk1  | TRG  | 0,983               | 1,274      | 1,136 - 1,450 | 1,073 - 1,592 | 0,001 | UP     |

Cq and efficiencies used for these analyses are in Table\_SI\_2\_Cq.
