# Supplementary material for: PaPro1 and IDC4, Two Genes Controlling Stationary Phase, Sexual Development and Cell Degeneration in Podospora anserina
Source: MDPI journal article supplement (doi:10.3390/jof4030085), 2018-07-11
Supplement: s1 [file s1]

Table S1

## Primers used

| Deletions, tagging and complementation |             |                                                            |             |                                    |               |
|----------------------------------------|-------------|------------------------------------------------------------|-------------|------------------------------------|---------------|
| Primer name                            |             | sequence                                                   |             |                                    |               |
| IDC4 (Pa_2_230)                        |             |                                                            |             |                                    |               |
| Deletion                               |             |                                                            |             |                                    |               |
| 5'Pa_2_230A                            |             | aaggcctgtgacacctcacc                                       |             |                                    |               |
| 5'Pa_2_230B                            |             | CTATTTAACGACCCTGCCCTGAACCGttacaagttccccgcgtt               |             |                                    |               |
| mk_2_230E                              |             | caacgcggggaaactgttaaCGGTTCAGGGCAGGGTCGTTAAATAG             |             |                                    |               |
| mk_2_230F                              |             | gaccatcaaccgaaccaaaCATCGAACTGGATCTCAACAGCGGTAAG            |             |                                    |               |
| 3'Pa_2_230C                            |             | CTTACCGCTGTTGAGATCCAGTTCGATGtttggttcgggttgatggtc           |             |                                    |               |
| 3'Pa_2_230D                            |             | ggcttcttgggatgggtag                                        |             |                                    |               |
| Complementation                        |             |                                                            |             |                                    |               |
| IDC <sup>508</sup> -left               |             | ggcctgtgacacctcacc                                         |             |                                    |               |
| IDC <sup>508</sup> -right              |             | tctttgtgccaacgacca                                         |             |                                    |               |
| mCherry Tagging                        |             |                                                            |             |                                    |               |
| XhoI 508 tag for                       |             | aaaaactcgagtcacactacaccggtcccg                             |             |                                    |               |
| Hind3 508 tag rev                      |             | aaaaaaagcttgggagcatggccgttctgtgtgc                         |             |                                    |               |
| PaPro1 (Pa_1_10140)                    |             |                                                            |             |                                    |               |
| Deletion                               |             |                                                            |             |                                    |               |
| 5'Pa_1_10140A                          |             | gcacgtcgtacccctgtctc                                       |             |                                    |               |
| 5'Pa_1_10140B                          |             | CTATTTAACGACCCTGCCCTGAACCGcctcgtcgtgttcaaggtc              |             |                                    |               |
| mk_1_10140E                            |             | gaccttgaacacgagcgaggCGGTTCAGGGCAGGGTCGTTAAATAG             |             |                                    |               |
| mk_1_10140F                            |             | gttgtgccccatgatccagtCATCGAACTGGATCTCAACAGCGGTAAG           |             |                                    |               |
| 3'Pa_1_10140C                          |             | CTTACCGCTGTTGAGATCCAGTTCGATGactggatcatggggcacaac           |             |                                    |               |
| 3'Pa_1_10140D                          |             | cgagaatgggttgactgttgc                                      |             |                                    |               |
| PaPro45 (Pa_1_15490)                   |             |                                                            |             |                                    |               |
| Deletion                               |             |                                                            |             |                                    |               |
| 5'Pa_1_15490A                          |             | gctaaaagtcgagacagaaaacggtcaagg                             |             |                                    |               |
| 5'Pa_1_15490B                          |             | CTATTTAACGACCCTGCCCTGAACCGggttaagtcggtggaaaagcgtattcaaaag  |             |                                    |               |
| mk_1_15490E                            |             | cttttgaatacgttttccaccgacttaccCGGTTCAGGGCAGGGTCGTTAAATAG    |             |                                    |               |
| mk_1_15490F                            |             | atgttggtgtgtgacaaaggaaaacccaagCATCGAACTGGATCTCAACAGCGGTAAG |             |                                    |               |
| 3'Pa_1_15490C                          |             | CTTACCGCTGTTGAGATCCAGTTCGATGcttggttttctttgtcacacaacaacat   |             |                                    |               |
| 3'Pa_1_15490D                          |             | gaaactctcaaactgcacagcaaccttgac                             |             |                                    |               |
| PaPro22 (Pa_2_9440)                    |             |                                                            |             |                                    |               |
| Deletion                               |             |                                                            |             |                                    |               |
| 5'Pa_1_9440A                           |             | atgatttttcagctgcttcaaagttcgtca                             |             |                                    |               |
| 5'Pa_1_9440B                           |             | CTATTTAACGACCCTGCCCTGAACCGgcatgatcccttgttcacatcaacttcatt   |             |                                    |               |
| mk_1_9440E                             |             | aatgaagttgatgtgaacaagggatcatgcCGGTTCAGGGCAGGGTCGTTAAATAG   |             |                                    |               |
| mk_1_9440F                             |             | cttgatcgtttgctttaccatttaccgacCATCGAACTGGATCTCAACAGCGGTAAG  |             |                                    |               |
| 3'Pa_1_9440C                           |             | CTTACCGCTGTTGAGATCCAGTTCGATGgtcggtaaaggttaaagcaaacgatccaag |             |                                    |               |
| 3'Pa_1_9440D                           |             | ggacgaaagtaacgaggattacgtgtgtgat                            |             |                                    |               |
| RT-qPCR                                |             |                                                            |             |                                    |               |
| Type of gene <sup>a</sup>              | Gene number | Gene name or function                                      | Primer name | Primer sequence 5'>3' <sup>b</sup> | Amplicon size |
| HKG                                    | Pa_1_16650  | AS1                                                        | AS1f        | CAACATGGCTGACGAATAC/AACGC          | 115 bp        |
|                                        |             |                                                            | AS1r        | GGAGGTCAGGTCAAGGAGA/GCATC          |               |
| HKG                                    | Pa_3_6780   | CIT1                                                       | CIT1f       | CTCCTCCAAGACCCAG/ACCCTC            | 100 bp        |
|                                        |             |                                                            | CIT1r       | GACCTTGGAGCCATGCTCC/TTTC           |               |

|     |                   |               |                      |                             |        |
|-----|-------------------|---------------|----------------------|-----------------------------|--------|
| HKG | <i>Pa_3_5110</i>  | <i>GPD</i>    | GPDf                 | CATTGAGCCCAAGTACGCT/GAG     | 113 bp |
|     |                   |               | GPD <sub>r</sub>     | GTCGCGCTCAGTGTAAGACTTGA     |        |
| HKG | <i>Pa_2_4990</i>  | <i>HOM2</i>   | HOM2E1E2             | GCAAGATGAAGCGCTTCAG/ACTTAC  | 175 bp |
|     |                   |               | HOM2E3E2             | CGTTTTATTTTGGCGCGT/CTGTTTTG |        |
| HKG | <i>Pa_2_6460</i>  | <i>PAH1</i>   | PAH1f                | GATCTGGTTCCAGAACCG/ACGTG    | 247 bp |
|     |                   |               | PAH1 <sub>r</sub>    | GCAGTTGAGATGATGAATCA/AAAC   |        |
| HKG | <i>Pa_7_6690</i>  | <i>PDF2</i>   | PDFf                 | GCAGACAGGTTGAAAAAG/ATTG     | 294 bp |
|     |                   |               | PDF <sub>r</sub>     | CAGATGATCAATGGTT/TCTTGC     |        |
| HKG | <i>Pa_4_8980</i>  | <i>TBP</i>    | TBPf                 | CACACCCACTCTTCA/GAACATT     | 106 bp |
|     |                   |               | TBP <sub>r</sub>     | ACGCTTGGGGTTGTA/CTCAGC      |        |
| HKG | <i>Pa_7_8490</i>  | <i>TIP41</i>  | TIPf                 | GTTTGGCGGAGGTGAAGAAG/AA     | 146 bp |
|     |                   |               | TIP <sub>r</sub>     | CCGTCTCACCTCGAGAC           |        |
| HKG | <i>Pa_4_7790</i>  | <i>UBC</i>    | UBCf                 | GGCCATCCCATCCATCAAC         | 107 bp |
|     |                   |               | UBC <sub>r</sub>     | GGTGATGGTCTTGCCAGTGA/GA     |        |
| Gol | <i>Pa_1_13940</i> | <i>STE11</i>  | 13940AF2             | CGGCCCTATTCTAGAT/ATGTC      | 187 bp |
|     |                   |               | 13940intR            | CGGCTTCGCTCTTTCCTTC         |        |
| Gol | <i>Pa_6_4110</i>  | <i>PaHMG8</i> | 4110f                | ACGCTGTCGGATAAGTTTGC        | 190 bp |
|     |                   |               | 4110 <sub>r</sub>    | CCTGTTGCTGCTGCTCCTT         |        |
| Gol | <i>Pa_1_20590</i> | <i>FPR1</i>   | FPR1f                | GGCGTTCTCAATACAATGAA/GTCG   | 297 bp |
|     |                   |               | FPR1 <sub>r</sub>    | GCCACCAGTCATGACGGAAATG      |        |
| Gol | <i>Pa_2_2310</i>  | <i>MFP</i>    | MFPf                 | CGTACGGGAGTGGACTTGGATGGA    | 149 bp |
|     |                   |               | MFP <sub>r</sub>     | CGACACTGAGGCGGTACCCAAAAG    |        |
| Gol | <i>Pa_4_1380</i>  | <i>PRE2</i>   | 1380f                | GTTGATGTTTGTGCCCG/TGG       | 177 bp |
|     |                   |               | 1380 <sub>r</sub>    | TCGGTGGTTGTGCCAGTCG         |        |
| Gol | N/A <sup>c</sup>  | <i>FMR1</i>   | FMR1f                | GGTTTCATGGGCTACCGAT/CCTAC   | 251 bp |
|     |                   |               | FMR1 <sub>r</sub>    | CATCCAAGGGCTTCCATGTAGC      |        |
| Gol | <i>Pa_1_8290</i>  | <i>MFM</i>    | MFMf                 | CCACCCTCGCAACAACACGTTAGA    | 150 bp |
|     |                   |               | MFM <sub>r</sub>     | AAACGAAGGCGATGCTCATGTTGG    |        |
| Gol | <i>Pa_7_9070</i>  | <i>PRE1</i>   | 9070f                | CGGCGGTCATCTTTACGGT         | 195 bp |
|     |                   |               | 9070 <sub>r</sub>    | GGTAAAAGGTGAGGC/AAGCC       |        |
| Gol | <i>Pa_1_2410</i>  | <i>PaNox1</i> | 2410f2               | GCTGCCCATTACGTCAA/CTTC      | 94 bp  |
|     |                   |               | 2410 <sub>r</sub> 2  | TGGCACCACGGGGCTGAAC         |        |
| Gol | <i>Pa_1_7250</i>  | <i>PaNoxD</i> | 7250f1               | CCTGGCCTCGGCAACTT/ACC       | 204 bp |
|     |                   |               | 7250 <sub>r</sub> 1  | CTGCGGTGGATGCTGGTG          |        |
| Gol | <i>Pa_2_13340</i> | <i>PaMpk1</i> | 13340f2              | AGGAAAATGCCGGGTACA          | 112 bp |
|     |                   |               | 13340 <sub>r</sub> 2 | CCAACAGACCATACGTCAA/TAG     |        |

<sup>a</sup>: HKG: housekeeping gene, used as candidate for reference gene; GoI: gene of interest.

<sup>b</sup>: slash (/) indicates two consecutive exons.
