# Supplementary material for: PaPro1 and IDC4, Two Genes Controlling Stationary Phase, Sexual Development and Cell Degeneration in Podospora anserina
Source: J Fungi (Basel). 2018 Jul 11;4(3):85. doi: 10.3390/jof4030085 (PMC6162560; doi:10.3390/jof4030085)
Supplement: Supplementary file 1 [file jof-04-00085-s001.zip]

Archive with 5 entries (5 files):
- supplementary figures.pdf
- Table S1.pdf
- Table S2.xlsx
- Table S3.xlsx
- Table S4.pdf
