# Supplementary material for: PaPro1 and IDC4, Two Genes Controlling Stationary Phase, Sexual Development and Cell Degeneration in Podospora anserina
Source: J Fungi (Basel). 2018 Jul 11;4(3):85. doi: 10.3390/jof4030085 (PMC6162560; doi:10.3390/jof4030085)
Supplement: Supplementary file 1 [file jof-04-00085-s001.zip › Table S2.xlsx]

## Sheet: strains
Strain	biological replicate number
WT mat+	1-1	see average Cq for three technical replicates on next sheets
	1-2
	1-3
	1-4
	1-5
	1-6
WT mat-	2-1
	2-2
	2-3
	2-4
	2-5
	2-6
∆511 mat+	3-1
	3-2
	3-3
	3-4
	3-5
	3-6
∆511 mat-	4-1
	4-2
	4-3
	4-5
	4-6

## Sheet: mat+
biological replicate number	AS1	CIT1	GPD	HOM2	PAH1	PDF2	TBP	TIP	UBC	STE11	HMG8	FPR1	MFP	PRE2	Nox1	NoxD	Mpk1
1-1	17.26	22.2	16.14	21.24	19.56	19.78	18.83	22.29	17.12	22.62	21.09	24.17	12.1	17.59	20.54	20.1	18.88
1-2	17.06	21.71	15.87	21.02	19.38	19.46	18.5	22.06	16.71	22.56	20.87	23.93	12.1	17.3	20.38	20.02	18.62
1-3	17.14	21.63	15.76	21.05	19.29	19.38	18.56	22.08	16.68	22.44	20.79	23.77	12.21	17.18	20.3	20.09	18.57
1-4	17.42	22.3	16.17	21.1	19.58	19.83	19.02	22.27	17.05	22.84	21.1	24.06	12.21	17.58	20.67	20.15	19.03
1-5	17.16	21.71	15.92	20.98	19.33	19.41	18.63	22.09	16.71	22.59	20.92	24.01	12.47	17.27	20.33	20.04	18.61
1-6	16.9	21.66	15.61	20.41	19.07	19.21	18.49	21.89	16.51	22.17	20.54	23.86	12.11	17.05	20.14	19.73	18.31
3-1	17.37	21.51	15.63	20.86	19.67	19.08	18.42	22.15	15.94	22.15	22.42	24.76	14.94	21.53	20.12	20.47	18.11
3-2	17.41	21.43	15.64	20.94	19.59	19.01	18.4	22.04	15.94	22.18	22.59	25.11	14.78	21.46	20.22	20.49	18.18
3-3	17.42	21.47	15.53	20.93	19.6	19.02	18.5	22.03	15.94	22.57	23.04	25.34	14.64	21.97	20.08	20.28	18.11
3-4	17.31	21.46	15.44	20.74	19.79	19.17	18.37	22.01	15.95	21.97	22.09	24.77	14.89	21.53	20.13	20.56	18.09
3-5	17.65	21.69	15.96	21.15	19.83	19.28	18.69	22.19	16.08	22.28	22.36	25.22	14.17	21.62	20.45	20.86	18.34
3-6	17.27	21.29	15.46	20.52	19.25	18.82	18.25	21.82	15.63	21.29	21.77	24.94	15.4	20.91	20.01	20.28	17.92
amplification efficiency	1.91	1.88	1.917	1.893	1.848	1.907	1.974	1.862	1.915	1.825	1.814	1.957	1.788	1.969	1.987	1.919	1.983

## Sheet: mat-
biological replicate number	AS1	CIT1	GPD	HOM2	PAH1	PDF2	TBP	TIP	UBC	STE11	HMG8	FMR1	MFM	PRE1	Nox1	NoxD	Mpk1
2-1	17.12	21.89	15.83	21.06	19.41	19.51	18.54	22.07	16.57	22.84	21.4	21.43	16.08	19.43	20.46	20.01	18.62
2-2	17.03	22.15	15.9	21.14	19.49	19.49	18.65	22.11	16.62	22.98	21.24	21.24	15.96	19.22	20.6	20.13	18.59
2-3	17.16	22.17	15.92	21.23	19.68	19.49	18.77	22.14	16.7	22.91	21.34	21.39	15.95	19.34	20.61	20.28	18.74
2-4	17.19	22.03	16.02	21.21	19.7	19.54	18.72	22.17	16.72	23.09	21.36	21.75	16.37	19.42	20.73	20.26	18.67
2-5	17.12	22.03	15.86	20.99	19.44	19.39	18.53	22.01	16.66	22.68	21.13	21.37	15.91	19.11	20.49	19.98	18.6
2-6	18.15	22.9	16.69	21.53	20.27	20.43	19.48	22.96	17.44	23.48	21.81	22.08	16.77	19.94	21.33	20.94	19.44
4-1	17.39	21.7	15.63	20.78	19.45	18.87	18.25	21.89	15.87	22.82	23.1	24.46	18.08	24.18	20.02	20.37	18.13
4-2	17.29	21.69	15.51	20.99	19.64	18.93	18.35	21.89	15.82	22.93	23.27	24.42	18.14	24.67	20.22	20.65	18.04
4-3	17.39	21.75	15.68	20.99	19.66	19.02	18.35	22.09	15.86	22.78	23.09	24.39	18.19	24.23	20.2	20.7	18.21
4-4	17.31	21.9	15.95	21.28	19.91	19.24	18.54	22.05	16.03	22.53	22.85	24.07	17.59	24.11	20.45	20.84	18.19
4-5	17.32	21.73	15.73	21.07	19.73	19.15	18.42	22	15.97	22.33	22.77	24.08	17.26	23.83	20.28	20.56	17.98
4-6	17.43	22.05	15.94	21.09	19.88	19.16	18.74	22.03	15.92	22.27	22.71	23.99	17.39	23.71	20.33	20.76	18.03
amplification efficiency	1.91	1.88	1.917	1.893	1.848	1.907	1.974	1.862	1.915	1.825	1.814	1.957	1.788	1.969	1.987	1.919	1.983
