# Supplementary material for: PaPro1 and IDC4, Two Genes Controlling Stationary Phase, Sexual Development and Cell Degeneration in Podospora anserina
Source: J Fungi (Basel). 2018 Jul 11;4(3):85. doi: 10.3390/jof4030085 (PMC6162560; doi:10.3390/jof4030085)
Supplement: Supplementary file 1 [file jof-04-00085-s001.zip › Table S3.xlsx]

## Sheet: strains
Strain	biological replicate number
WT mat+	1-1
	1-2
	1-3
	1-4
	1-5
	1-6
WT mat-	2-1
	2-2
	2-3
	2-4
	2-5
	2-6
∆511 mat+	3-1
	3-2
	3-3
	3-4
	3-5
	3-6
∆511 mat-	4-1
	4-2
	4-3
	4-5
	4-6

## Sheet: mat+
biological replicate	AS1	CIT1	GPD	HOM2	PAH1	PDF2	TBP	TIP	UBC
1-1	17.26	22.2	16.14	21.24	19.56	19.78	18.83	22.29	17.12
1-2	17.06	21.71	15.87	21.02	19.38	19.46	18.5	22.06	16.71
1-3	17.14	21.63	15.76	21.05	19.29	19.38	18.56	22.08	16.68
1-4	17.42	22.3	16.17	21.1	19.58	19.83	19.02	22.27	17.05
1-5	17.16	21.71	15.92	20.98	19.33	19.41	18.63	22.09	16.71
1-6	16.9	21.66	15.61	20.41	19.07	19.21	18.49	21.89	16.51
3-1	17.37	21.51	15.63	20.86	19.67	19.08	18.42	22.15	15.94
3-2	17.41	21.43	15.64	20.94	19.59	19.01	18.4	22.04	15.94
3-3	17.42	21.47	15.53	20.93	19.6	19.02	18.5	22.03	15.94
3-4	17.31	21.46	15.44	20.74	19.79	19.17	18.37	22.01	15.95
3-5	17.65	21.69	15.96	21.15	19.83	19.28	18.69	22.19	16.08
3-6	17.27	21.29	15.46	20.52	19.25	18.82	18.25	21.82	15.63
Cq min	16.9	21.29	15.44	20.41	19.07	18.82	18.25	21.82	15.63
efficiency	1.91	1.88	1.917	1.893	1.848	1.907	1.974	1.862	1.915
	AS1	CIT1	GPD	HOM2	PAH1	PDF2	TBP	TIP	UBC
1-1	0.792188	0.56301	0.63411	0.588796	0.740144	0.5381	0.67406	0.746637	0.379812
1-2	0.901643	0.767103	0.755914	0.677545	0.826651	0.66157	0.843652	0.8614	0.495744
1-3	0.856154	0.806838	0.812009	0.664697	0.873626	0.696632	0.80992	0.850757	0.505502
1-4	0.71427	0.528568	0.62185	0.643822	0.731109	0.52101	0.592356	0.755978	0.397485
1-5	0.845145	0.767103	0.731714	0.695063	0.852428	0.683271	0.772268	0.845484	0.495744
1-6	1	0.791702	0.89527	1	1	0.777433	0.849409	0.957418	0.564536
3-1	0.737759	0.870333	0.883694	0.750382	0.691797	0.845491	0.890822	0.814529	0.817575
3-2	0.718907	0.915415	0.877962	0.713034	0.726633	0.884572	0.903021	0.872177	0.817575
3-3	0.71427	0.892589	0.943114	0.717599	0.722184	0.878881	0.843652	0.877615	0.817575
3-4	0.766966	0.898242	1	0.810103	0.64265	0.797769	0.921634	0.888595	0.81228
3-5	0.615496	0.776849	0.712913	0.623604	0.627056	0.743085	0.741391	0.794525	0.74649
3-6	0.787078	1	0.987069	0.932209	0.895352	1	1	1	1

## Sheet: mat-
biological replicate	AS1	CIT1	GPD	HOM2	PAH1	PDF2	TBP	TIP	UBC
2-1	17.12	21.89	15.83	21.06	19.41	19.51	18.54	22.07	16.57
2-2	17.03	22.15	15.9	21.14	19.49	19.49	18.65	22.11	16.62
2-3	17.16	22.17	15.92	21.23	19.68	19.49	18.77	22.14	16.7
2-4	17.19	22.03	16.02	21.21	19.7	19.54	18.72	22.17	16.72
2-5	17.12	22.03	15.86	20.99	19.44	19.39	18.53	22.01	16.66
2-6	18.15	22.9	16.69	21.53	20.27	20.43	19.48	22.96	17.44
4-1	17.39	21.7	15.63	20.78	19.45	18.87	18.25	21.89	15.87
4-2	17.29	21.69	15.51	20.99	19.64	18.93	18.35	21.89	15.82
4-3	17.39	21.75	15.68	20.99	19.66	19.02	18.35	22.09	15.86
4-4	17.31	21.9	15.95	21.28	19.91	19.24	18.54	22.05	16.03
4-5	17.32	21.73	15.73	21.07	19.73	19.15	18.42	22	15.97
4-6	17.43	22.05	15.94	21.09	19.88	19.16	18.74	22.03	15.92
Cq min	17.03	21.69	15.51	20.78	19.41	18.87	18.25	21.89	15.82
efficiency	1.91	1.88	1.917	1.893	1.848	1.907	1.974	1.862	1.915
	AS1	CIT1	GPD	HOM2	PAH1	PDF2	TBP	TIP	UBC
2-1	0.943424	0.881391	0.812009	0.836369	1	0.66157	0.821012	0.894136	0.61429
2-2	1	0.747976	0.775849	0.794741	0.952059	0.670166	0.761835	0.872177	0.594655
2-3	0.919318	0.738591	0.765817	0.750382	0.847209	0.670166	0.702133	0.856062	0.564536
2-4	0.901643	0.806838	0.717567	0.76002	0.836867	0.648881	0.726418	0.840245	0.557247
2-5	0.943424	0.806838	0.79631	0.874578	0.981746	0.714854	0.826614	0.928116	0.5794
2-6	0.484443	0.465875	0.463987	0.619637	0.589707	0.365303	0.433234	0.514188	0.349049
4-1	0.792188	0.993707	0.92488	1	0.975735	1	1	1	0.968036
4-2	0.845145	1	1	0.874578	0.868278	0.962009	0.934255	1	1
4-3	0.792188	0.962832	0.89527	0.874578	0.857678	0.907711	0.934255	0.883088	0.974346
4-4	0.834278	0.875844	0.751011	0.726816	0.735612	0.787536	0.821012	0.905322	0.872458
4-5	0.828897	0.975065	0.866609	0.831048	0.82159	0.834645	0.890822	0.933904	0.907141
4-6	0.771946	0.796715	0.755914	0.820509	0.74929	0.829274	0.716605	0.916649	0.937094
